## **The Association of Stay-at-Home Orders and the Spread of COVID-19 in Rural and Urban United States**

Authors: David H. Jiang, B.A.<sup>1\*</sup>; Darius J. Roy, M.P.H.<sup>2\*</sup>; Benjamin D. Pollock, Ph.D.<sup>1,3</sup>; Nilay D. Shah, Ph.D.<sup>1</sup>; Rozalina G. McCoy, M.D., M.S.<sup>1,4</sup>

1. Division of Health Care Delivery Research, Robert D. and Patricia E. Kern Center for the Science of Health Care Delivery, Mayo Clinic; Rochester, MN
2. Division of Cardiovascular Medicine, Brigham and Women's Hospital; Boston, MA
3. Department of Quality, Experience, and Affordability, Mayo Clinic; Rochester, MN
4. Division of Community Internal Medicine, Department of Medicine, Mayo Clinic; Rochester, MN

\* Mr. Jiang and Mr. Roy contributed equally to this work

Corresponding Author: David H. Jiang; Division of Health Care Delivery Research, Robert D. and Patricia E. Kern Center for the Science of Health Care Delivery, Mayo Clinic; 200 First Street SW, Rochester, MN 55905; (507) 422-6908; (507) 261-0002; [jiang.david@mayo.edu](mailto:jiang.david@mayo.edu)

## **Abstract**

*Background:* Throughout the spring of 2020, stay-at-home orders were imposed to curb the spread of COVID-19. There is limited data on the effectiveness of stay-at-home orders, particularly in rural as compared to urban areas.

*Objective:* To examine the association between stay-at-home order implementation and the incidence of COVID-19 in rural vs. urban counties.

*Design:* Interrupted time series analysis using a mixed effects zero-inflated Poisson model.

*Participants:* 3,142 U.S. counties.

*Interventions:* Stay-at-home orders.

*Main Measures:* COVID-19 daily incidence (primary) and mobility (secondary and intermediate measure of stay-at-home effectiveness)

*Key Results:* Stay-at-home orders were implemented later (median March 30 vs. March 28) and were shorter (median 35 vs. 54 days) in rural than urban counties. Indoor mobility was, on average, 2.6-6.9% higher in rural than urban counties both during and after stay-at-home orders. Compared to the baseline (pre-stay-at-home) period, the number of new COVID-19 cases increased under stay-at-home by IRR 1.60 (95% CI, 1.57-1.64) in rural and 1.36 (95% CI, 1.30-1.42) in urban counties. For each day under stay-at-home orders, the number of new cases changed by a factor of 0.982 (95% CI 0.981-0.982) in rural and 0.952 (95% CI, 0.951-0.953) in urban counties compared to prior to stay-at-home. Each day after stay-at-home orders expired, the number of new cases changed by a factor of 0.995 (95% CI, 0.994-0.995) in rural and 0.997 (95% CI, 0.995-0.999) in urban counties compared to prior to stay-at-home.

*Conclusion:* Stay-at-home orders decreased mobility and slowed the spread of COVID-19, but less effectively in rural than in urban counties. This necessitates a critical reevaluation of how stay-at-home orders are designed, communicated, and implemented in rural areas.

*Keywords:* Stay at home; COVID-19; urban-rural; disparities; health policy

## Introduction

As cases of coronavirus disease-2019 (COVID-19) emerged in the United States in early 2020, pressure grew on federal, state, and local governments to implement public health guidelines aimed at reducing its impact on the healthcare system and society. These measures included school and non-essential business closures, bans on social gatherings, and stay-at-home orders. However, the U.S. is not monolithic, and in the absence of a unified federal strategy,<sup>1</sup> the timing, duration, stringency, and enforcement of stay-at-home orders varied widely across municipalities.<sup>2</sup> Nearly one-fifth of the U.S. population resides in rural areas.<sup>3</sup> Resource availability, political affiliation, and attitudes toward COVID-19 all differ between rural and urban areas,<sup>4</sup> and, as such, public health guidance and implementation may need to be adapted to the unique needs and circumstances of each setting. Thus, while emerging evidence has demonstrated an overall effectiveness of physical distancing measures as enforced by stay-at-home orders,<sup>5-11</sup> potential differences in their effectiveness and durability (i.e., continued effectiveness even after the stay-at-home orders are lifted) of stay-at-home orders between rural and urban areas have not been explored. Identification of such differences would call for closer examination of barriers to optimal implementation and effectiveness with the goal of developing more effective, adaptive, and scalable public health guidelines going forward. With the more transmissible B.1.617.2 (Delta) variant of SARS-CoV-2 virus now the dominant strain in the U.S. and the resurgence of cases,<sup>12</sup> there are discussions of new stay-at-home orders in many jurisdictions.<sup>13</sup> As such, it is more important to consider the difference in efficacy of stay-at-home orders between geographical regions.

We focus on rural areas specifically because as COVID-19 first emerged in urban centers<sup>14</sup> and only later spread throughout the country, rural perception of the pandemic and

response to it may have differed from urban areas.<sup>4</sup> As a result, rural residents may feel that public health regulations stemming from urban experiences do not equally apply to rural populations, which in turn, may have led to differences in the adoption of stay-at-home orders, the fidelity to physical distancing, and ultimately to the spread of COVID-19.

Stay-at-home orders are only effective if they translate to greater physical distancing and reduced mobility, particularly in indoor settings that pose the highest risk for COVID-19 transmission. Several studies have correlated changes in population-level mobility with COVID-19 infection rates<sup>6 15</sup> and demonstrated reduced mobility with the passage of stay-at-home orders.<sup>2 16 17</sup> Yet, public intent to comply with physical distancing regulations has varied widely across the U.S., influenced by religious affiliation,<sup>18</sup> income,<sup>19</sup> political ideology,<sup>20</sup> and local/state political leadership.<sup>21</sup> We hypothesize that it also differed between rural and urban areas, though this has not heretofore been explicitly assessed.

Better understanding of the spread of COVID-19 and of the effectiveness and durability of stay-at-home orders in rural areas, specifically, is important because rural populations are highly susceptible to severe manifestations of COVID-19.<sup>22</sup> Rates of obesity,<sup>23</sup> heart disease,<sup>24 25</sup> chronic lung disease,<sup>24</sup> diabetes,<sup>25</sup> smoking,<sup>26</sup> and multimorbidity are major risk factors for serious COVID-19 illness and are all higher in rural than urban settings.<sup>26</sup> Rural residents are also older than urban residents<sup>26</sup> and age is a major determinant of COVID-19 severity and mortality.<sup>27</sup> Furthermore, rural areas may have lower resiliency against the pandemic, with fewer intensive care unit (ICU) beds<sup>26</sup> and many small regional and critical access hospitals and clinics already facing financial hardship.<sup>28</sup>

Thus, in the face of these unique challenges facing rural residents, identifying opportunities to improve the effectiveness of stay-at-home orders is critical as the nation faces

resurgence of case numbers and new strains of COVID-19.<sup>29</sup> The recent increases in the case numbers in many states and across the nation have led policy makers to consider reimplementing or fully reinstating stay-at-home orders.<sup>30</sup> In order to optimize the current iteration of stay-at-home orders and inform future infection control efforts, we examine the effectiveness of such orders in rural and urban areas of the United States. Specifically, we examine the mobility patterns and COVID-19 infection rates in rural and urban counties during and after stay-at-home orders, focusing specifically on how stay-at-home orders impacted rates of new infections and mobility in these areas.

## **Methods**

### *Data Sources and Study Population*

County-level COVID-19 case data was acquired from the Centers for Disease Control and Prevention, courtesy of USAFacts.org, a nonpartisan, nonprofit government data repository.<sup>31</sup> The dataset contained cumulative county-level cases for all 3,142 U.S. counties and county-equivalents between January 22 and June 10, 2020. Each county was categorized as urban or rural using 2013 county-level Rural-Urban Continuum Codes (RUCC) per the Economic Research Service of the U.S. Department of Agriculture and the Office of Management and Budget.<sup>32</sup> Urban counties were defined as having RUCC of 1-3 and rural counties as RUCC of 4-7.

Start and end dates of stay-at-home orders were identified from data compiled and published by the *New York Times*,<sup>33 34</sup> which was then manually verified for completeness and accuracy by the study team via internet search and review of state executive orders. A binary variable was created to indicate each day individual counties were under stay-at-home. When stay-at-home orders were issued by state governments, it was assumed that all counties in that

state fell under that order. If individual counties issued their own stay-at-home orders (e.g. Davis County, Utah<sup>35</sup>), county-specific start and end dates were identified and applied. If stay-at-home orders were declared by individual cities (e.g. Jackson, Wyoming,<sup>36</sup> Oklahoma City, Oklahoma<sup>37</sup>), those stay-at-home order dates were applied to the rest of that county, as cities comprised the majority of that county's population.

County-level mobility trends were identified from COVID-19 Community Mobility Reports between February 15 and June 14, 2020, available from Google, LLC.<sup>38</sup> This data presents how the visitors to or time spent in specific categories of places change each day compared to a baseline day. The baseline day is represented by a normal value for that day of the week based on the median value from the 5-week period between January 3 and February 6, 2020.

### *Outcomes*

The primary outcome was the number of new cases of COVID-19 per day per 100,000 people in the county recorded 14 days from the current date. A lag of 14 days was selected based on the duration of susceptibility to a new diagnosis of COVID-19 after an initial exposure.<sup>39 40</sup> Sensitivity analyses were performed for 5-day and 10-day lagged cases. Secondary outcomes were percent changes in county-level mobility for the following categories: grocery/pharmacy, retail/recreation, residential, and workplace. Transit and parks categories were not included due to insufficient data for all counties.

### *Independent Variables*

Independent variables included in the models were the primary exposure of county classification (rural vs. urban), stay-at-home order status (before, during, or after), days since

start of follow-up (to account for time), days under stay-at-home orders, and days after stay-at-home orders.

### *Statistical Analysis*

Interrupted time series analysis of county-level, 14-day lagged COVID-19 daily new cases examined the impact of stay-at-home orders on rural and urban counties. Models included the independent variables outlined above and interaction terms between each of the variables and rural/urban status. To account for differences between counties, we used a mixed effects models with random intercept by county.

A variety of mixed effects count data models were compared on the basis of model diagnostics, Akaike information criterion (AIC), and parsimony: Poisson, zero-inflated Poisson, zero-inflated Poisson with random intercept and slope, negative binomial, negative binomial with random intercept and slope, and zero-inflated negative binomial. All used the same variables for the fixed effects to account for the time varying nature of stay-at-home orders and were offset by county population divided by 100,000 to standardize by population. Models were run using the `glmmTMB` package in R,<sup>41</sup> while model diagnostics examined the simulated quantile scaled residuals using the `DHARMA` package in R.<sup>42</sup> Models were assessed for over-dispersion, zero-inflation, and distribution of residuals. The mixed effects zero-inflated Poisson model with random intercept by county was chosen as the best model, as it was not significantly zero-inflated, not over-dispersed, did not contain outliers, and had the expected distribution of residuals. It was temporally autocorrelated by the Durbin-Watson test, but this is unavoidable (additions of variance-covariance structures led to significant over-dispersion) and did not have a significant effect on the results because of the long follow-up time, the significance of the results, and the large number of counties.<sup>43</sup> Using offsets calculated from rural and urban population



averages, we visualized the impact of stay-at-home orders by estimating the number of new COVID-19 cases in rural and urban counties for the start, end, and duration of stay-at-home orders. We conducted sensitivity analysis surrounding the lag time for our regression. We conducted a five-day and a ten-day lag and compared the results to that of our original 14-day lag. Detailed description of the methods is available in the Supplement.

Google Community Mobility Reports were analyzed for differences in during- and post-stay-at-home mobility between urban and rural counties using repeated measures ANOVA via the `rstatix` package in R.<sup>44</sup> Before testing for significance, all of the mobility data were examined for outliers and normality. Outliers were classified as observations outside of 1.5 times the interquartile range (IQR) of their respective distribution (mobility type and rurality).

Grocery/pharmacy and workplace were the only categories with outliers, with 8 outliers (4 days) and 2 outliers (1 day) removed for these categories, respectively.

Difference in stay-at-home duration between county type was assessed using Wilcoxon rank sum test with continuity correction.

Figure 2 was generated by inputting the estimates of fixed effects and the urban and rural averages of stay-at-home orders start and end dates. The outcome was divided by the offset to standardize the results per 100,000 population. The respective offsets for urban and rural counties were calculated using urban and rural counties respective population averages. Similarly, the extrapolations were generated by using the conditional model only with intercept and variables: Rurality, Days, and Rurality\*Days. The extrapolations represent continuation of the before stay-at-home order trends.

## Results

We analyzed data for all 1,976 rural (62.9%) and 1,166 urban (37.1%) U.S. counties, home to 46,063,061 (14.0%) and 282,176,462 (86.0%) people, respectively (**Table 1**). As of June 10, 2020, there were 1,786,886 cases of COVID-19 in the U.S., of which 9.0% (N=161,452) were in rural counties. Adjusted for population, this translates to 350.5 per 100,000 persons in rural counties and 576.0 per 100,000 persons in urban counties. During the study period, 1854 (93.8%) rural counties and 1075 (92.2%) urban counties were covered by a stay-at-home order. The median start date for stay-at-home orders was March 30 for rural counties and March 28 for urban counties. The median duration of stay-at-home orders was 35 days (IQR 28-68) for rural counties and 54 days (IQR 29-70) for urban counties ( $p < 0.001$ ).

#### *County-Level Mobility Trends*

Mobility across all categories prior to the implementation of stay-at-home orders was similar in rural and urban counties (**Figure 1**). There was an approximately 25% increase in grocery/pharmacy mobility prior to implementation of stay-at-home orders, potentially reflecting anticipatory shopping prior to sheltering in place. This was preceded by a 15% increase and subsequent decline in retail/recreation mobility. The increase in grocery/pharmacy mobility coincided with a 25% decrease in work-place mobility and a 10% increase in residential mobility, consistent with transition to working from home.

After implementation of stay-at-home orders, mobility in grocery/pharmacy, retail/recreation, and workplace decreased 10-40%, while residential mobility increased 10-20%. These reductions in mobility were significantly more pronounced in urban compared to rural counties, with the average absolute differences of 6.89%, 4.43%, 5.76%, and 2.67% for retail/recreation, grocery/pharmacy, workplace, and residential locations, respectively ( $p < 0.0001$ ). After stay-at-home orders elapsed, all mobility began to increase toward baseline

levels, more rapidly in urban than rural areas. Grocery/pharmacy mobility ultimately exceeded baseline mobility in rural areas.

### *County-Level Case Trends*

Estimated numbers of new COVID-19 cases in rural and urban counties before, during, and after stay-at-home orders are depicted in **Figure 2**, using median dates of stay-at-home order initiation and termination for visual demonstration. In rural counties, implementation of stay-at-home orders decreased the growth of daily new COVID-19 cases from 2.1% (95% CI, 2.1%-2.2%) growth in cases per day to 0.3% (95% CI, 0.2%-0.4%) growth per day. After stay-at-home orders expired, the daily new case increase was slower than before they were put in place, with 0.2% (95% CI, -0.4% to -0.1%) decline in new cases per day. However, stay-at-home orders were more effective at preventing the spread of COVID-19 in urban counties, where the changes in the number of new daily COVID-19 cases were 4.3% (95% CI, 4.2%-4.4%) increase per day before stay-at-home, 0.7% (95% CI, -0.9% to -0.5%) decrease per day during stay-at-home, and 1% (95% CI, -1.4% to -0.6%) decrease per day after the stay-at-home order period.

The number of new COVID-19 cases increased from baseline to during stay-at-home orders by 60.4% (IRR 1.60; 95% CI, 1.57 – 1.64) in rural counties and by 35.9% (IRR 1.36; 95% CI, 1.30 – 1.42) in urban counties; **Table 2**. For each day under stay-at-home orders, the number of daily new cases slowed by a factor of 0.982 (95% CI 0.981 – 0.982) in rural counties and 0.952 (95% CI, 0.951 – 0.953) in urban counties, i.e., slowing down more in urban counties each day under stay-at-home.

After stay-at-home orders were lifted, rates of new COVID-19 infections were 39.8% greater (IRR 1.40; 95% CI, 1.36 – 1.44) than before they had been implemented in rural counties and 17.8% lower (IRR 0.82; 95% CI, 0.77 – 0.87) in urban counties, reinforcing the greater

effectiveness of stay-at-home orders in urban than rural counties. Each additional day following the expiration of stay-at-home orders saw a reduction in the number of new COVID-19 cases by a factor of 0.995 in rural counties (95% CI, 0.994 – 0.995) and 0.997 in urban counties (95% CI, 0.995 – 0.999). That is to say that the rates of new cases were decreasing by 0.5% and 0.3% per day in rural and urban counties, respectively, after stay-at-home orders ended.

### *Sensitivity Analysis*

We examined the impact of stay-at-home orders on 5-day and 10-day lagged new cases of COVID-19 (Supplement p.). None of the study conclusions for inferences changed with either of these two different lags.

### **Discussion**

Physical distancing and other infection control efforts are essential to containing the spread of COVID-19. Our analysis of COVID-19 infection spread in rural and urban areas of the United States before, during, and after the implementation of stay-at-home orders revealed important successes and opportunities for improvement of this public health approach. Urban areas, which, on average, implemented stay-at-home orders earlier and maintained them longer, were able to effectively slow the growth of COVID-19 cases both while stay-at-home orders were in place and after they expired. Implementation of stay-at-home orders in rural areas was also associated with slowed the spread of COVID-19, but the observed decrease in case growth in rural areas was significantly smaller than in urban areas and the COVID-19 case load rebounded much faster after stay-at-home orders expired. These differences in the effectiveness and durability of stay-at-home orders between rural and urban areas may be driven by greater mobility of rural as compared to urban residents that we observed both during and after the stay-at-home period.

Stay-at-home orders, while they were in place, were associated with higher population-adjusted daily new cases in rural than urban areas, driven by both delayed implementation of stay-at-home orders and their shorter duration. Our analysis suggests that each additional day under stay-at-home restrictions was associated with a significant decrease in the rate of new COVID-19 infections. After stay-at-home orders expired, urban areas continued to see a much slower rate of COVID-19 spread than before restrictions were implemented, while rural areas returned near to the pre-stay-at-home baseline. This is likely driven by a range of individual, systemic, and political factors. Recent research suggests that the strongest determinants of the timing, issuance, enforcement, and adherence of stay-at-home orders are political affiliations and geography.<sup>16 21 45-48</sup> Rural areas are more likely to be politically conservative and under Republican leadership<sup>49-51</sup> leading to stay-at-home orders being delayed, cut short, or both, and with less enforcement of mobility restrictions.

Moreover, for stay-at-home orders to be effective and have a durable effect on infection control, individuals need to alter their daily routines and reduce high risk behaviors. Residents of rural areas consistently had higher mobility at high-risk indoor locations such as grocery stores, pharmacies, and places of retail and recreation, rendering stay-at-home orders less efficacious. This is consistent with an earlier study showing that pandemic-era declines in restaurant visits was nearly double in urban areas as compared to rural areas.<sup>52</sup> Political affiliation of rural residents may have dampened their adherence to physical distancing regulations.<sup>16 21 48</sup> Local news coverage of COVID-19 as a problem mainly affecting urban areas may have also diminished rural citizens' intentions to comply.<sup>53</sup> Finally, rural residents are frequently employed in fields not amenable to telework, such as agriculture, manufacturing, and service industries,<sup>54</sup> and hence may be unable to fully comply with stay-at-home orders.<sup>55</sup>

As states are considering implementing a new round of stay-at-home orders, our findings reveal several ways to improve the implementation, enforcement, and adherence. First, they should be implemented earlier and maintained longer for optimal effectiveness. There was marked heterogeneity in the timing and duration of stay-at-home orders and our data reinforces the need for multi-jurisdictional, ideally federal, infection control mandates.<sup>56</sup> Any new stay-at-home orders should be gradually implemented to avoid the pre-stay-at-home surge of mobility and subsequent spike in COVID-19 cases. To better encourage and facilitate compliance, leaders at all levels need to use scientific evidence to advocate for the importance of stay-at-home orders, set personal examples, and develop employment, housing, educational, and healthcare assistance for the most vulnerable.<sup>55</sup>

While our study is the first to examine the effects of stay-at-home orders on rural and urban areas, it has limitations. We focused on stay-at-home orders without considering the heterogeneity of what constituted these orders on the local level and did not separately weigh the impacts of additional measures such as school closures, nonessential business closures, prohibition of large gatherings, and mandatory masking. However, it would be difficult to separate these effects as most restrictions were implemented concurrent with, and worked in tandem to, stay-at-home orders. COVID-19 case data may be biased by differences in testing availability. However, because testing was more limited in rural than urban areas,<sup>57</sup> our findings are likely an underestimate of the true difference in infection rates between urban and rural counties. We were not able to examine hospitalization and ICU utilization rates in rural and urban counties as these data are not uniformly available at the county-level. Finally, our study does not take into account potential residual or unmeasured confounders that may explain the difference in infection rates between rural and urban counties outside of stay-at-home order

implementation. We accounted for this by using a random intercept in our analysis, but due to the absence of granular data at the county-level, potential confounding would be impossible to eliminate completely.

High rates of COVID-19 in rural counties, along with the suppressed effect of stay-at-home orders relative to urban counties, are very concerning. Residents of rural counties are older and have higher rates of chronic health conditions that place them at high risk for severe COVID-19 disease and death.<sup>26 27 58</sup> Rural areas also lack the resources of urban areas to care for patients with COVID-19, with fewer hospitals, ICU beds, infectious disease specialists, and public health professionals.<sup>22 28</sup> They may also have fewer support systems for people disabled by post-COVID-19 complications,<sup>59</sup> leading to longer-term disability and personal and financial hardship. Additional research is needed to examine whether there is differential impact of stay-at-home orders on mortality and case fatality rates in rural and urban areas.

## **Conclusion**

Shorter duration and lower effectiveness of stay-at-home orders in rural areas have led to the greater spread of COVID-19 in rural as compared to urban areas when standardized for population. This calls for urgent reevaluation of how stay-at-home orders are designed, communicated, and implemented in rural areas and throughout the United States.

## Disclosures

**Availability of data:** All data used for this study are publicly available. The daily COVID-19 case data can be found at USAFacts, available at <https://usafacts.org/visualizations/coronavirus-covid-19-spread-map/>. Mobility data can be found from Google COVID-19 Community Mobility Data, available at <https://www.google.com/covid19/mobility/>. Stay-at-home orders were manually collected from news releases and official executive orders, this data is available from the authors upon request.

**Conflict of Interest:** The authors have no conflicts of interest to declare. In the past 36 months, Dr. McCoy also received support from an AARP<sup>®</sup> Quality Measure Innovation Grant, the Mayo Clinic Center for Health Equity and Community Engagement Research, and the Mayo Clinic Robert D. and Patricia E. Kern Center for the Science of Health Care Delivery. In the past 36 months, Dr. Shah has received research support through Mayo Clinic from the Food and Drug Administration to establish Yale-Mayo Clinic Center for Excellence in Regulatory Science and Innovation (CERSI) program (U01FD005938); the Centers of Medicare and Medicaid Innovation under the Transforming Clinical Practice Initiative (TCPI); the Agency for Healthcare Research and Quality (1U19HS024075; R01HS025164; R01HS025402; R03HS025517); the National Heart, Lung and Blood Institute of the National Institutes of Health (NIH) (R56HL130496; R01HL131535); the National Science Foundation; and the Patient Centered Outcomes Research Institute (PCORI) to develop a Clinical Data Research Network (LHSNet).

**Funding:** This effort was funded by the National Institute of Health National Institute of Diabetes and Digestive and Kidney Diseases grant K23DK114497 (McCoy) and the Mayo Clinic



Research Pipeline K2R Program Award (McCoy). Study contents are the sole responsibility of the authors and do not necessarily represent the official views of NIH.

**Authors' Contributions:** D.H.J. and D.J.R. are the guarantors of the manuscript. They had full access to the data in the study and takes responsibility for the integrity of the data and accuracy of the data analysis. D.H.J. and D.J.R. designed the study, analyzed and interpreted the results and drafted the manuscript. B.D.P and N.D.S edited the manuscript and contributed to the discussion. R.G.M. supervised the study, interpreted the results, and reviewed/edited the manuscript.

## References

1. Gordon SH, Huberfeld N, Jones DK. What Federalism Means for the US Response to Coronavirus Disease 2019. *JAMA Health Forum* 2020;1(5):e200510-e10. doi: 10.1001/jamahealthforum.2020.0510
2. Moreland A, Herlihy C, Tynan MA, et al. Timing of State and Territorial COVID-19 Stay-at-Home Orders and Changes in Population Movement - United States, March 1-May 31, 2020. *MMWR Morb Mortal Wkly Rep* 2020;69(35):1198-203. doi: 10.15585/mmwr.mm6935a2 [published Online First: 2020/09/04]
3. New Census Data Show Differences Between Urban and Rural Populations: United States Census Bureau, 2016.
4. Cramer KJ. *The Politics of Resentment: Rural Consciousness in Wisconsin and the Rise of Scott Walker*. Chicago, IL: University of Chicago Press 2016.
5. Courtemanche C, Garuccio J, Le A, et al. Strong Social Distancing Measures In The United States Reduced The COVID-19 Growth Rate. *Health Aff (Millwood)* 2020;39(7):1237-46. doi: 10.1377/hlthaff.2020.00608 [published Online First: 2020/05/15]
6. Lyu W, Wehby GL. Shelter-In-Place Orders Reduced COVID-19 Mortality And Reduced The Rate Of Growth In Hospitalizations. *Health Aff (Millwood)* 2020;39(9):1615-23. doi: 10.1377/hlthaff.2020.00719 [published Online First: 2020/07/10]
7. Castillo RC, Staguhn ED, Weston-Farber E. The effect of state-level stay-at-home orders on COVID-19 infection rates. *Am J Infect Control* 2020;48(8):958-60. doi: 10.1016/j.ajic.2020.05.017 [published Online First: 2020/05/29]
8. Siedner MJ, Harling G, Reynolds Z, et al. Social distancing to slow the US COVID-19 epidemic: Longitudinal pretest-posttest comparison group study. *PLoS Med*

2020;17(8):e1003244. doi: 10.1371/journal.pmed.1003244 [published Online First: 2020/08/12]

9. Xu J, Hussain S, Lu G, et al. Associations of Stay-at-Home Order and Face-Masking Recommendation with Trends in Daily New Cases and Deaths of Laboratory-Confirmed COVID-19 in the United States. *Explor Res Hypothesis Med* 2020;1-10. doi: 10.14218/erhm.2020.00045 [published Online First: 2020/08/01]
10. Lurie MN, Silva J, Yorlets RR, et al. COVID-19 epidemic doubling time in the United States before and during stay-at-home restrictions. *J Infect Dis* 2020 doi: 10.1093/infdis/jiaa491 [published Online First: 2020/08/02]
11. Ager KA, Shah SS, Richardson T, et al. Association Between Statewide School Closure and COVID-19 Incidence and Mortality in the US. *JAMA* 2020;324(9):859-70. doi: 10.1001/jama.2020.14348
12. COVID Data Tracker. In: Prevention CfDCa, ed. Online, 2021.
13. Cunningham E. Spread of delta variant prompts new restrictions worldwide. *The Washington Post* 2021.
14. Paul R, Arif AA, Adeyemi O, et al. Progression of COVID-19 From Urban to Rural Areas in the United States: A Spatiotemporal Analysis of Prevalence Rates. *J Rural Health* 2020;36(4):591-601. doi: 10.1111/jrh.12486 [published Online First: 2020/07/01]
15. Gao S, Rao J, Kang Y, et al. Association of Mobile Phone Location Data Indications of Travel and Stay-at-Home Mandates With COVID-19 Infection Rates in the US. *JAMA Netw Open* 2020;3(9):e2020485. doi: 10.1001/jamanetworkopen.2020.20485 [published Online First: 2020/09/09]

16. Gigliotti P, Martin EG. Predictors of State-Level Stay-at-Home Orders in the United States and Their Association With Mobility of Residents. *J Public Health Manag Pract* 2020;26(6):622-31. doi: 10.1097/phh.0000000000001236 [published Online First: 2020/09/25]
17. Sehra ST, George M, Wiebe DJ, et al. Cell Phone Activity in Categories of Places and Associations With Growth in Cases of COVID-19 in the US. *JAMA Intern Med* 2020 doi: 10.1001/jamainternmed.2020.4288 [published Online First: 2020/09/01]
18. Lennon RP, Sakya SM, Miller EL, et al. Public Intent to Comply with COVID-19 Public Health Recommendations. *Health Lit Res Pract* 2020;4(3):e161-e65. doi: 10.3928/24748307-20200708-01 [published Online First: 2020/09/15]
19. Wolf MS, Serper M, Opsasnick L, et al. Awareness, Attitudes, and Actions Related to COVID-19 Among Adults With Chronic Conditions at the Onset of the U.S. Outbreak: A Cross-sectional Survey. *Ann Intern Med* 2020;173(2):100-09. doi: 10.7326/M20-1239 [published Online First: 2020/04/09]
20. Hartwell M, Greiner B, Kilburn Z, et al. Association of public interest in preventative measures and increased COVID-19 cases after expiration of Stay-at-Home orders: A cross-sectional study. *Disaster Med Public Health Prep* 2020:1-12. doi: 10.1017/dmp.2020.333 [published Online First: 2020/09/11]
21. Greiner B, Ottwell R, Vassar M, et al. Public Interest in Preventive Measures of Coronavirus Disease 2019 Associated With Timely Issuance of Statewide Stay-at-Home Orders. *Disaster Med Public Health Prep* 2020:1-4. doi: 10.1017/dmp.2020.189 [published Online First: 2020/06/06]

22. Peters DJ. Community Susceptibility and Resiliency to COVID-19 Across the Rural-Urban Continuum in the United States. *J Rural Health* 2020;36(3):446-56. doi: 10.1111/jrh.12477 [published Online First: 2020/06/17]
23. Trivedi T, Liu J, Probst J, et al. Obesity and obesity-related behaviors among rural and urban adults in the USA. *Rural Remote Health* 2015;15(4):3267. [published Online First: 2015/10/16]
24. Rural Americans at higher risk of death from five leading causes. Online: Centers for Disease Control and Prevention, 2017.
25. O'Connor A, Wellenius G. Rural-urban disparities in the prevalence of diabetes and coronary heart disease. *Public Health* 2012;126(10):813-20. doi: 10.1016/j.puhe.2012.05.029 [published Online First: 2012/08/28]
26. Orgera K, McDermott D, Rae M, et al. Urban and rural differences in coronavirus pandemic preparedness. Health System Tracker. Online: Kaiser Family Foundation, 2020.
27. Team CC-R. Severe Outcomes Among Patients with Coronavirus Disease 2019 (COVID-19) — United States, February 12–March 16, 2020. *Morbidity and Mortality Weekly Report*. Online: Center for Disease Control and Prevention, 2020.
28. Henning-Smith C. The Unique Impact of COVID-19 on Older Adults in Rural Areas. *J Aging Soc Policy* 2020;32(4-5):396-402. doi: 10.1080/08959420.2020.1770036 [published Online First: 2020/06/02]
29. Tang X, Wu C, Li X, et al. On the origin and continuing evolution of SARS-CoV-2. *National Science Review* 2020;7(6):1012-23. doi: 10.1093/nsr/nwaa036
30. Pan ES. Regional Stay At Home Order. In: Health CDoP, Agency HaHS, California So, eds. Online: State of California, 2020.

31. Coronavirus Locations: COVID-19 Map by County and State. Online: USAFacts; Centers for Disease Control and Prevention, 2020.
32. Rural-Urban Continuum Codes. Online: Economic Research Service, US Department of Agriculture, 2019.
33. Lee JC, Mervosh S, Avila Y, et al. See How All 50 States Are Reopening (and Closing Again). *The New York Times* 2020 September 4, 2020.
34. Mervosh S, Lu D, Swales V. See Which States and Cities Have Told Residents to Stay at Home. *The New York Times* 2020 April 20, 2020.
35. Public Health Order. In: Health DCBo, Department DCH, eds. Online: Board of Davis County Commissioners, 2020.
36. An Emergency Ordinance to Stay-At-Home for All within the Town of Jackson to Limit the Spread of COVID-19 in the Town of Jackson; and Other Restrictions within the Town of Jackson, Wyoming; Declaring an Emergency, Providing for an Effective Date and a Time for Termination. In: Town Council of the Town of Jackson W, ed. Emergency Ordinance 1249, 2020.
37. ‘Shelter in Place’ order to be issued in Oklahoma City as COVID-19 state of emergency amended. Online: The City of Oklahoma City, 2020.
38. Google COVID-19 Community Mobility Reports. Online: Google LLC, 2020.
39. Interim Clinical Guidance for Management of Patients with Confirmed Coronavirus Disease (COVID-19) Online: Center for Disease Control and Prevention; 2020 [updated September 10, 2020. Available from: <https://www.cdc.gov/coronavirus/2019-ncov/hcp/clinical-guidance-management-patients.html>.

40. When You Can be Around Others Online: Centers for Disease Control and Prevention; 2020  
[Available from: <https://www.cdc.gov/coronavirus/2019-ncov/if-you-are-sick/end-home-isolation.html>].
41. Brooks ME, Kristensen K, Van Benthem KJ, et al. glmmTMB Balances Speed and Flexibility Among Packages for Zero-inflated Generalized Linear Mixed Modeling. *The R Journal* 2017;9(2):378-400. doi: 10.32614/RJ-2017-066
42. Hartig F, Lohse L. Residual Diagnostics for Hierarchical (Multi-Level / Mixed) Regression Models. *CRAN* 2020 doi: <https://cran.r-project.org/web/packages/DHARMA/index.html>
43. Mitchell DJ, Dujon AM, Beckmann C, et al. Temporal autocorrelation: a neglected factor in the study of behavioral repeatability and plasticity. *Behavioral Ecology* 2019;31(1):222-31. doi: 10.1093/beheco/arz180
44. Kassambara A. rstatix: Pipe-Friendly Framework for Basic Statistical Tests. *CRAN* 2020 doi: <https://CRAN.R-project.org/package=rstatix>
45. Kosnik LR, Bellas A. Drivers of COVID-19 Stay at Home Orders: Epidemiologic, Economic, or Political Concerns? *Econ Disaster Clim Chang* 2020:1-12. doi: 10.1007/s41885-020-00073-0 [published Online First: 2020/08/25]
46. Djulbegovic B, Weiss DJ, Hozo I. Evaluation of the U.S. governors' decision when to issue stay-at-home orders. *J Eval Clin Pract* 2020;26(5):1347-51. doi: 10.1111/jep.13458 [published Online First: 2020/08/15]
47. Adolph C, Amano K, Bang-Jensen B, et al. Pandemic Politics: Timing State-Level Social Distancing Responses to COVID-19. *J Health Polit Policy Law* 2020 doi: 10.1215/03616878-8802162 [published Online First: 2020/09/22]

48. Grossman G, Kim S, Rexer JM, et al. Political partisanship influences behavioral responses to governors' recommendations for COVID-19 prevention in the United States. *Proc Natl Acad Sci U S A* 2020;117(39):24144-53. doi: 10.1073/pnas.2007835117 [published Online First: 2020/09/17]
49. Knoke D, Henry C. Political Structure of Rural America. *The Annals of the American Academy of Political and Social Science* 1977;429:51-62.
50. Gimpel JG, Karnes KA. The Rural Side of the Urban-Rural Gap. *PS: Political Science and Politics* 2006;39(3):467-72.
51. Monnat SM, Brown DL. More than a Rural Revolt: Landscapes of Despair and the 2016 Presidential Election. *J Rural Stud* 2017;55:227-36. doi: 10.1016/j.jrurstud.2017.08.010 [published Online First: 2017/10/01]
52. Banerjee T, Nayak A, Zhao H. A county-level study of the effects of state-mandated COVID-19 lockdowns on urban and rural restaurant visits using consumers' cell phone geo-location data. *Z Gesundh Wiss* 2021:1-10. doi: 10.1007/s10389-020-01473-y
53. Kim E, Shepherd ME, Clinton JD. The effect of big-city news on rural America during the COVID-19 pandemic. *Proc Natl Acad Sci U S A* 2020;117(36):22009-14. doi: 10.1073/pnas.2009384117 [published Online First: 2020/08/21]
54. Laughlin L. Beyond the Farm: Rural Industry Workers in America Online: United States Census Bureau; 2016 [Available from: [https://www.census.gov/newsroom/blogs/random-samplings/2016/12/beyond\\_the\\_farm\\_rur.html](https://www.census.gov/newsroom/blogs/random-samplings/2016/12/beyond_the_farm_rur.html)].
55. Solis J, Franco-Paredes C, Henao-Martínez AF, et al. Structural Vulnerability in the U.S. Revealed in Three Waves of COVID-19. *Am J Trop Med Hyg* 2020;103(1):25-27. doi: 10.4269/ajtmh.20-0391 [published Online First: 2020/05/10]



56. Guest JL, Del Rio C, Sanchez T. The Three Steps Needed to End the COVID-19 Pandemic: Bold Public Health Leadership, Rapid Innovations, and Courageous Political Will. *JMIR Public Health Surveill* 2020;6(2):e19043. doi: 10.2196/19043 [published Online First: 2020/04/03]
57. Smith TC. The Pandemic Will Soon Test Rural America. *Foreign Affairs*. Online: Council on Foreign Affairs, 2020.
58. Peters DJ. Community Susceptibility and Resiliency to COVID-19 Across the Rural-Urban Continuum in the United States. *The Journal of Rural Health* 2020;36(3):446-56. doi: 10.1111/jrh.12477
59. Jiang DH, McCoy RG. Planning for the Post-COVID Syndrome: How Payers Can Mitigate Long-Term Complications of the Pandemic. *Journal of General Internal Medicine* 2020;35(10):3036-39. doi: 10.1007/s11606-020-06042-3

**Table 1. Study Cohort and Stay-at-Home Implementation**

|                                                                   | <b>Urban Counties</b> | <b>Rural Counties</b> | <b>U.S.A Total</b> |
|-------------------------------------------------------------------|-----------------------|-----------------------|--------------------|
| <b>Count N (%)</b>                                                | 1,166 (37%)           | 1,976 (63%)           | 3,142              |
| <b>Population N (%)</b>                                           | 282,176,462 (86.0%)   | 46,063,061 (14.0%)    | 328,239,523        |
| <b>Cases N (%)</b>                                                | 1,625,434 (91.0%)     | 161,452 (9.0%)        | 1,786,886          |
| <b>Cases per 100,000 persons</b>                                  | 576.03                | 350.50                | 544.38             |
| <b>Counties Stay at Home N (%)</b>                                | 1,075 (92.2%)         | 1,854 (93.8%)         | 2,929 (93.2%)      |
| <b>Median time before Stay at Home (Days) [IQR]</b>               | 66.0 [61-71]          | 68.0 [63-71]          | 68.0 [62-71]       |
| <b>Median Stay at Home length (Days) [IQR]</b>                    | 54.0 [29-70]          | 35.0 [28-68]          | 42.0 [28-69]       |
| <b>Median Days since stay at home elapsed (Days) [IQR]</b>        | 27.0 [11-42]          | 39.0 [14-45]          | 38.0 [13-42]       |
| <b>Median Stay at Home Start Date (Day since 1/22/2020) [IQR]</b> | 67.0 [64-72]          | 69.0 [63-73]          | 69.0 [63-73]       |

**Table 2. Model Estimates**

| <b>Variable</b>                                                              | <b>Estimate (IRR)</b> | <b>2.5% CI (IRR)</b> | <b>97.5% CI (IRR)</b> | <b>P-Value</b>       |
|------------------------------------------------------------------------------|-----------------------|----------------------|-----------------------|----------------------|
| <b>Intercept</b>                                                             | -0.645                | -0.712               | -0.578                | <0.0001              |
|                                                                              | (0.525)               | (0.491)              | (0.561)               |                      |
| <b>Urban (vs. rural)</b>                                                     | -0.905                | -1.003               | -0.808                | <0.0001              |
|                                                                              | (0.404)               | (0.367)              | (0.446)               |                      |
| <b>Period during stay-at-home (vs. before)</b>                               | 0.473                 | 0.451                | 0.494                 | <0.0001              |
|                                                                              | (1.604)               | (1.570)              | (1.640)               |                      |
| <b>Period after stay-at-home (vs. before)</b>                                | 0.335                 | 0.305                | 0.365                 | <0.0001              |
|                                                                              | (1.398)               | (1.357)              | (1.440)               |                      |
| <b>Days elapsed since 1/22/2020</b>                                          | 0.021                 | 0.020                | 0.021                 | <0.0001              |
|                                                                              | (1.021)               | (1.021)              | (1.022)               |                      |
| <b>Per day under stay-at-home orders</b>                                     | -0.018                | -0.019               | -0.018                | <0.0001              |
|                                                                              | (0.982)               | (0.981)              | (0.982)               |                      |
| <b>Per day after stay-at-home orders</b>                                     | -0.005                | -0.006               | -0.005                | <0.0001              |
|                                                                              | (0.995)               | (0.994)              | (0.995)               |                      |
| <b>Urban county interaction with period during stay-at-home (vs. before)</b> | -0.166                | -0.189               | -0.143                | <0.0001              |
|                                                                              | (0.847)               | (0.828)              | (0.866)               |                      |
| <b>Urban county interaction with period after stay-at-home (vs. before)</b>  | -0.531                | -0.562               | -0.499                | <0.0001              |
|                                                                              | (0.588)               | (0.570)              | (0.607)               |                      |
| <b>Urban county interaction with days elapsed since 1/22/2020</b>            | 0.022                 | 0.021                | 0.022                 | <0.0001              |
|                                                                              | (1.022)               | (1.021)              | (1.022)               |                      |
| <b>Urban county interaction with per day under stay-at-home orders</b>       | -0.031                | -0.032               | -0.030                | <0.0001              |
|                                                                              | (0.970)               | (0.969)              | (0.970)               |                      |
| <b>Urban county interaction with per day after stay-at-home orders</b>       | 0.002                 | 0.001                | 0.003                 | <0.0001              |
|                                                                              | (1.002)               | (1.001)              | (1.003)               |                      |
| <b>Urban county period during stay-at-home (vs. before)</b>                  | 0.307                 | 0.262                | 0.351                 | <0.0001 <sup>1</sup> |
|                                                                              | (1.359)               | (1.300)              | (1.421)               |                      |
| <b>Urban county period after stay-at-home (vs. before)</b>                   | -0.196                | -0.257               | -0.135                | <0.0001 <sup>1</sup> |
|                                                                              | (0.822)               | (0.773)              | (0.874)               |                      |
| <b>Urban county days elapsed since 1/22/2020</b>                             | 0.043                 | 0.041                | 0.044                 | <0.0001 <sup>1</sup> |
|                                                                              | (1.043)               | (1.042)              | (1.044)               |                      |
| <b>Urban county per day under stay-at-home orders</b>                        | -0.049                | -0.051               | -0.048                | <0.0001 <sup>1</sup> |
|                                                                              | (0.952)               | (0.951)              | (0.953)               |                      |
| <b>Urban county per day after stay-at-home orders</b>                        | -0.003                | -0.005               | -0.001                | <0.001 <sup>1</sup>  |
|                                                                              | (0.997)               | (0.995)              | (0.999)               |                      |

<sup>1</sup>. These variables are linear combinations meant to show the effect of multiple covariates. The p-values here were calculated using the confidence intervals and are not unique terms in the model.

**Figure 1. Changes in Mobility in Rural and Urban Counties.** Percent changes in mobility in (A) grocery and pharmacy, (B) retail and recreation, (C) work place, and (D) residential areas were calculated for rural and urban counties compared to the referent period of January 3 and February 6, 2020. P-values report the results of repeated measure ANOVA analysis.

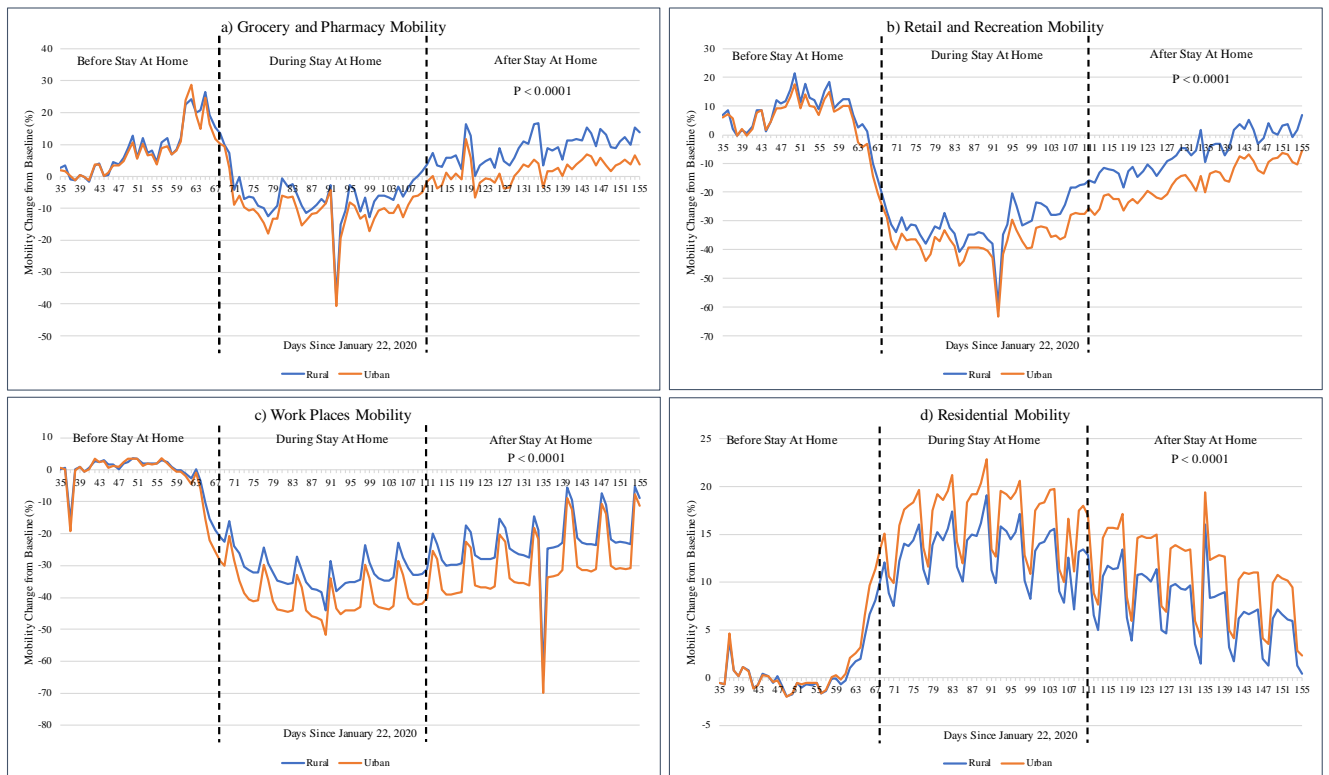

## Figure 2. Estimated Population-Standardized Daily New Cases of COVID-19 in Rural and Urban Counties.

Estimated numbers of new COVID-19 cases per day were modeled using median dates for the start and end of stay-at-home orders in rural and urban counties. We also extrapolated the predicted numbers of new daily COVID-19 infections in rural and urban counties had stay-at-home orders not been implemented to demonstrate the potential impact of these orders.

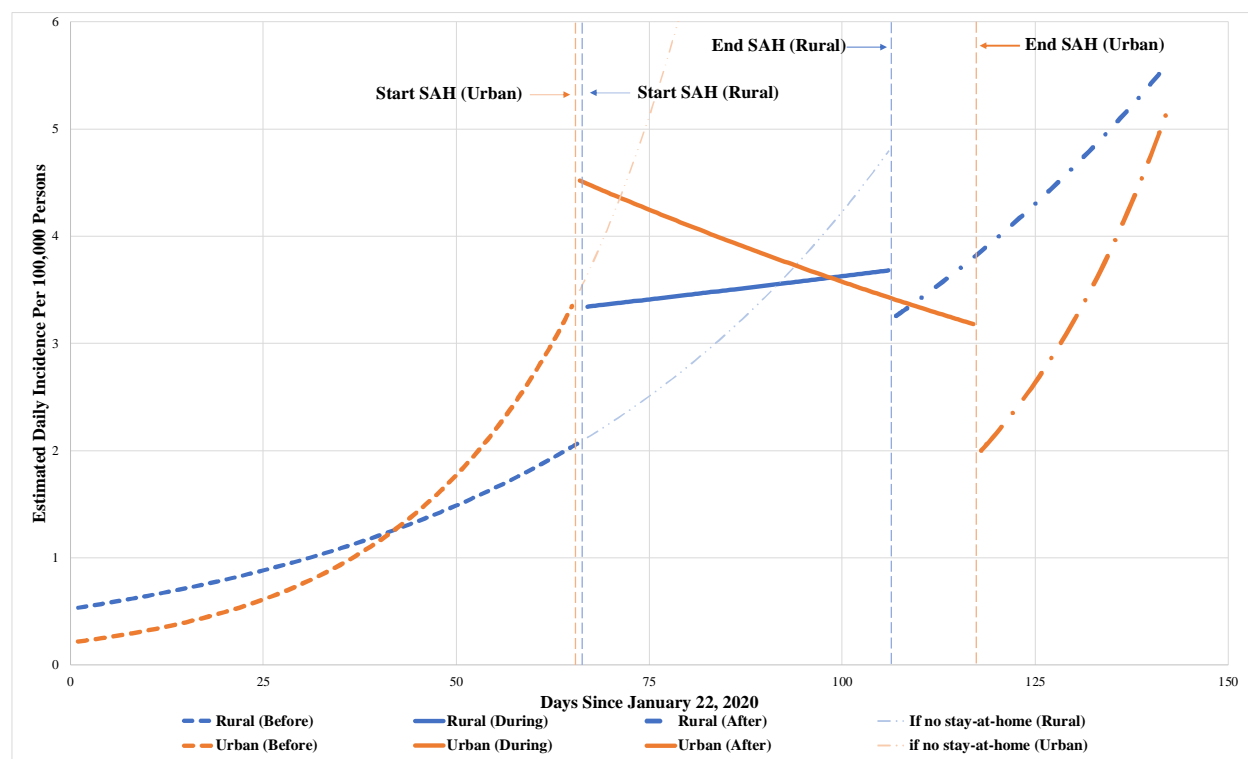

Source: http://medrxiv.org/content/10.1101/2021.07.13.21260476v1.full.pdf
